# Supplementary material for: Photoperiod Affects Leptin Action on the Choroid Plexus in Ewes Challenged with Lipopolysaccharide—Study on the mRNA Level
Source: PubMed Central journal article supplement (PMC7589540; doi:10.3390/ijms21207647), 2020-10-15
Supplement: ijms-21-07647-s001.pdf [file ijms-21-07647-s001.pdf]

1 **Supplementary Materials**

2 **Supplementary Figure S1: Body temperature values throughout the experiments.**

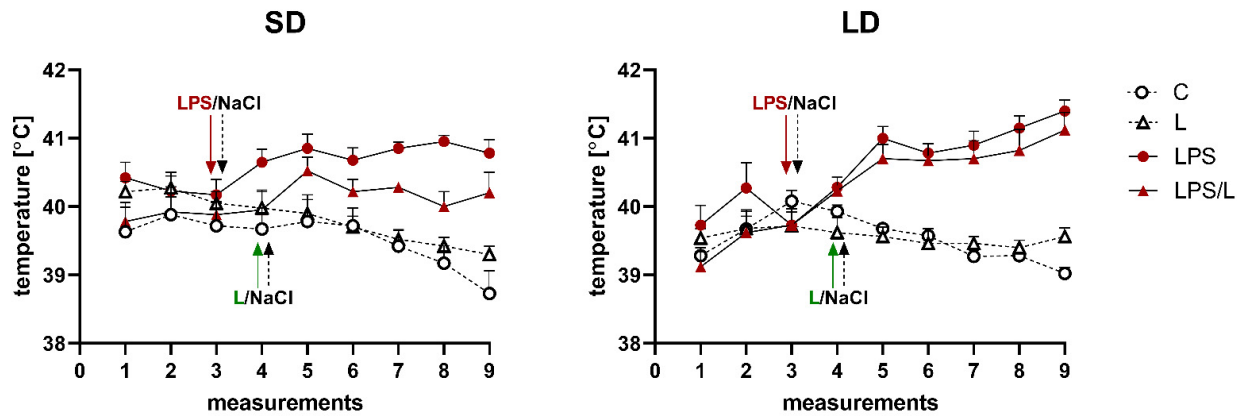

4 **Figure S1.** Mean ( $\pm$ SEM) body temperature values measured in ewes every half hour throughout the  
 5 experiments carried out during short-day (SD, left panel) and long-day (LD, right panel) photoperiod.

6 **Supplementary Figure S2: mRNA expression of *TLR4***

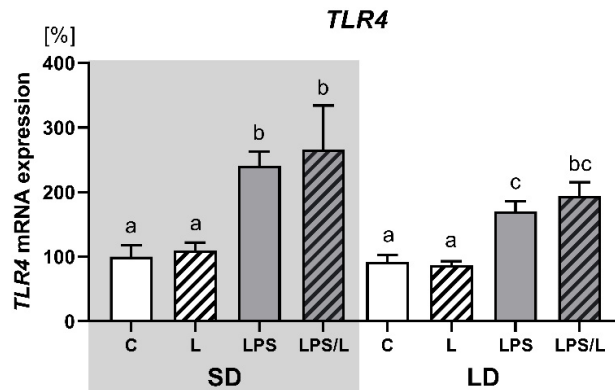

7

8 **Figure S2.** Mean ( $\pm$ SEM) relative TLR4 mRNA expression in the ovine choroid plexus of saline (C, control  
 9 - white bars), saline-leptin (L, white hatched bars), LPS (grey bars) and LPS-leptin (LPS/L, grey hatched  
 10 bars) treated ewes, during short-day (SD, dark background) and long-day (LD, light background)  
 11 photoperiod. The results are presented as percentage values [%], where SD C group is considered as  
 12 100%.

13 **Supplementary Figure S3: Cycle quantification values of *LEPRa* and *LEPRb* expression.**

14 Cq (cycle quantification) values obtained from raw real time PCR data analyzed with using Real-Time  
 15 PCR Miner software:

16 *LEPRa* - Cq range from 22.4 to 25.6; mean ( $\pm$  SEM)  $23.2 \pm 0.1$

17 *LEPRb* - Cq range from 21.7 to 25.8; mean ( $\pm$  SEM)  $23.7 \pm 0.1$

18
